# Supplementary material for: The Relationship of Race, Psychosocial Stress and Resiliency Indicators to Neurocognitive Impairment among Older Americans Enrolled in the Health and Retirement Survey: A Cross-Sectional Study
Source: MDPI journal article supplement (doi:10.3390/ijerph18031358), 2021-02-02
Supplement: s1 [file s1]

Assessing the impact of race, psychosocial stress and resiliency indicators on neurocognitive impairment: A cross-sectional study of older Americans enrolled in the Health and Retirement Survey

## Supplementary Tables

**Supplementary Table 1: Demographic characteristics of older American adults enrolled in the HRS 2012-14 sample by Race.**

|                                               | All (N=6317) | White/ Caucasian (N=5217) | Black / African American (N=815) | Other (N=285) |          |
|-----------------------------------------------|--------------|---------------------------|----------------------------------|---------------|----------|
| Characteristic                                | N (%)        | N (%)                     | N (%)                            | N (%)         | p-value  |
| <b>Age: mean(SD)</b>                          | 73.9 (6.7)   | 74.2 (6.7)                | 72.6 (6.3)                       | 72.2 (6.0)    |          |
| <b>Age categories (years)</b>                 |              |                           |                                  |               | < 0.0001 |
| <=70                                          | 2076 (32.9)  | 1615 (31.0)               | 332 (40.7)                       | 129 (45.3)    |          |
| 71-79                                         | 3055 (48.4)  | 2555 (49.0)               | 382 (46.9)                       | 118 (41.4)    |          |
| >80                                           | 1186 (18.8)  | 1047 (20.1)               | 101 (12.4)                       | 38 (13.3)     |          |
| <b>Sex</b>                                    |              |                           |                                  |               | 0.003    |
| Female                                        | 3764 (59.6)  | 3077 (59.0)               | 528 (64.8)                       | 159 (55.8)    |          |
| <b>Marital Status</b>                         |              |                           |                                  |               | < 0.0001 |
| Never married                                 | 177 (2.8)    | 113 (2.2)                 | 48 (5.9)                         | 16 (5.6)      |          |
| Married/ partnered                            | 3910 (61.9)  | 3381 (64.8)               | 355 (43.6)                       | 174 (61.0)    |          |
| Separated/Divorced                            | 672 (10.6)   | 475 (9.1)                 | 159 (19.5)                       | 38 (13.3)     |          |
| Widowed                                       | 1558 (24.7)  | 1248 (23.9)               | 253 (31.0)                       | 57 (20.0)     |          |
| <b>Education</b>                              |              |                           |                                  |               | < 0.0001 |
| Less than High School/GED                     | 1326 (21.0)  | 961 (18.4)                | 255 (31.3)                       | 110 (38.6)    |          |
| High-school graduate                          | 2062 (32.6)  | 1751 (33.6)               | 255 (31.3)                       | 56 (19.6)     |          |
| Some college and above                        | 2927 (46.4)  | 2504 (48.0)               | 304 (37.4)                       | 119 (41.8)    |          |
| <b>Health Insurance</b>                       |              |                           |                                  |               | 0.0003   |
| Yes                                           | 6081 (98.1)  | 5033 (98.3)               | 783 (97.6)                       | 265 (95.0)    |          |
| <b>Ever smoked</b>                            |              |                           |                                  |               | 0.6196   |
| Yes                                           | 3459 (54.8)  | 2851 (54.6)               | 457 (56.1)                       | 151 (53.0)    |          |
| <b>Current alcohol use</b>                    |              |                           |                                  |               | < 0.0001 |
| Yes                                           | 3209 (50.8)  | 2802 (53.7)               | 296 (36.3)                       | 111 (38.9)    |          |
| <b>No. of comorbidities ever had</b>          |              |                           |                                  |               | < 0.0001 |
| None                                          | 424 (6.7)    | 360 (6.9)                 | 35 (4.3)                         | 29 (10.2)     |          |
| One                                           | 1096 (17.3)  | 939 (18.0)                | 105 (12.9)                       | 52 (18.2)     |          |
| Two                                           | 1719 (27.2)  | 1415 (27.1)               | 241 (29.6)                       | 63 (22.1)     |          |
| Three or more                                 | 3077 (48.7)  | 2502 (48.0)               | 434 (53.2)                       | 141 (49.5)    |          |
| <b>Diagnosis of HD, T2DM or Stroke</b>        |              |                           |                                  |               | < 0.0006 |
| Yes                                           | 3177 (50.2)  | 2566 (49.2)               | 454 (55.7)                       | 157 (55.1)    |          |
| <b>Ever had High blood pressure</b>           |              |                           |                                  |               | < 0.0001 |
| Yes                                           | 4317 (68.5)  | 3443 (66.1)               | 678 (83.3)                       | 196 (69.0)    |          |
| <b>BMI</b>                                    |              |                           |                                  |               | < 0.0001 |
| BMI < 18.5 kg/m <sup>2</sup> (Underweight)    | 101 (1.6)    | 85 (1.6)                  | 10 (1.2)                         | 6 (2.1)       |          |
| BMI 18.5-24 kg/m <sup>2</sup> (Normal weight) | 1736 (27.5)  | 1508 (28.9)               | 145 (17.8)                       | 83 (29.1)     |          |
| BMI 25-29 kg/m <sup>2</sup> (Overweight)      | 2390 (37.8)  | 1976 (37.9)               | 305 (37.4)                       | 109 (38.3)    |          |
| BMI ≥30 kg/m <sup>2</sup> (Obese)             | 2090 (33.1)  | 1648 (31.6)               | 355 (43.6)                       | 87 (30.5)     |          |

SD=Standard Deviation

Note: 02 missing education; 116 missing health insurance; 46 missing smoking status; 1 missing alcohol consumption; 14 missing High blood pressure.

**Supplementary Table 2: Other factors in relation to risk for Neurocognitive impairment among older adults from HRS 2012-14.**

| Variable                                                                                                                                                                                                                                                                                                                                                                                                                                                                                                                                                                                                                                                                                                                                                                    | n/N      | Model 1 (Crude)*         | Model 2 <sup>‡</sup>     | Model 3 <sup>α</sup>     | Model 4 <sup>†</sup>     |
|-----------------------------------------------------------------------------------------------------------------------------------------------------------------------------------------------------------------------------------------------------------------------------------------------------------------------------------------------------------------------------------------------------------------------------------------------------------------------------------------------------------------------------------------------------------------------------------------------------------------------------------------------------------------------------------------------------------------------------------------------------------------------------|----------|--------------------------|--------------------------|--------------------------|--------------------------|
| Age categories (years)                                                                                                                                                                                                                                                                                                                                                                                                                                                                                                                                                                                                                                                                                                                                                      |          | OR (95% CI)              | OR (95% CI)              | OR (95% CI)              | OR (95% CI)              |
| 71-79 vs <=70                                                                                                                                                                                                                                                                                                                                                                                                                                                                                                                                                                                                                                                                                                                                                               | 113/3055 | <b>1.36 (0.86, 2.16)</b> | 1.20 (0.76, 1.89)        | 1.25 (0.81, 1.95)        | 1.22 (0.78, 1.93)        |
| >80 vs <=70                                                                                                                                                                                                                                                                                                                                                                                                                                                                                                                                                                                                                                                                                                                                                                 | 134/1186 | <b>4.73 (3.01, 7.43)</b> | <b>4.0 (2.50, 6.50)</b>  | <b>4.34 (2.74, 6.87)</b> | <b>3.82 (2.35, 6.21)</b> |
| <b>Education</b>                                                                                                                                                                                                                                                                                                                                                                                                                                                                                                                                                                                                                                                                                                                                                            |          |                          |                          |                          |                          |
| Less than High School vs College and above                                                                                                                                                                                                                                                                                                                                                                                                                                                                                                                                                                                                                                                                                                                                  | 123/1326 | <b>3.08 (2.22, 4.26)</b> | <b>2.07 (1.55, 2.78)</b> | <b>1.94 (1.43, 2.64)</b> | <b>2.04 (1.51, 2.75)</b> |
| High School vs College and above                                                                                                                                                                                                                                                                                                                                                                                                                                                                                                                                                                                                                                                                                                                                            | 83/2062  | 1.08 (0.75, 1.56)        | 0.86 (0.59, 1.24)        | 0.84 (0.58, 1.22)        | 0.85 (0.58, 1.24)        |
| <b>Marital Status</b>                                                                                                                                                                                                                                                                                                                                                                                                                                                                                                                                                                                                                                                                                                                                                       |          |                          |                          |                          |                          |
| Never married vs Married                                                                                                                                                                                                                                                                                                                                                                                                                                                                                                                                                                                                                                                                                                                                                    | 10/177   | 1.81 (0.72, 4.54)        | 1.79 (0.71, 4.50)        | 1.64 (0.66, 4.05)        | 1.75 (0.69, 4.44)        |
| Separated/divorced vs Married                                                                                                                                                                                                                                                                                                                                                                                                                                                                                                                                                                                                                                                                                                                                               | 39/672   | <b>1.62 (1.10, 2.39)</b> | <b>1.65 (1.09, 2.49)</b> | <b>1.63 (1.09, 2.43)</b> | <b>1.67 (1.11, 2.51)</b> |
| Widowed vs Married                                                                                                                                                                                                                                                                                                                                                                                                                                                                                                                                                                                                                                                                                                                                                          | 100/1558 | <b>2.03 (1.42, 2.92)</b> | 1.23 (0.81, 1.87)        | 1.23 (0.82, 1.84)        | 1.21 (0.80, 1.83)        |
| <b>Sex</b>                                                                                                                                                                                                                                                                                                                                                                                                                                                                                                                                                                                                                                                                                                                                                                  |          |                          |                          |                          |                          |
| Male vs Female                                                                                                                                                                                                                                                                                                                                                                                                                                                                                                                                                                                                                                                                                                                                                              | 135/2553 | 1.17 (0.91, 1.50)        | <b>1.48 (1.13, 1.93)</b> | <b>1.44 (1.11, 1.87)</b> | <b>1.51 (1.17, 1.95)</b> |
| <b>Body Mass Index</b>                                                                                                                                                                                                                                                                                                                                                                                                                                                                                                                                                                                                                                                                                                                                                      |          |                          |                          |                          |                          |
| Underweight vs normal                                                                                                                                                                                                                                                                                                                                                                                                                                                                                                                                                                                                                                                                                                                                                       | 7/101    | 1.77 (0.81, 3.86)        | 1.59 (0.62, 4.07)        | 1.35 (0.42, 4.28)        | 1.48 (0.56, 3.93)        |
| Overweight vs normal                                                                                                                                                                                                                                                                                                                                                                                                                                                                                                                                                                                                                                                                                                                                                        | 106/2333 | 0.83 (0.58, 1.18)        | 0.86 (0.60, 1.22)        | 0.86 (0.61, 1.21)        | 0.85 (0.60, 1.21)        |
| Obese vs normal                                                                                                                                                                                                                                                                                                                                                                                                                                                                                                                                                                                                                                                                                                                                                             | 89/2098  | 0.87 (0.59, 1.28)        | 0.89 (0.62, 1.29)        | 0.87 (0.60, 1.27)        | 0.88 (0.61, 1.27)        |
| <b>Alcohol consumption</b>                                                                                                                                                                                                                                                                                                                                                                                                                                                                                                                                                                                                                                                                                                                                                  |          |                          |                          |                          |                          |
| No vs Yes                                                                                                                                                                                                                                                                                                                                                                                                                                                                                                                                                                                                                                                                                                                                                                   | 209/3111 | <b>2.59 (1.88, 3.57)</b> | <b>1.98 (1.43, 2.75)</b> | <b>1.97 (1.44, 2.69)</b> | <b>1.94 (1.40, 2.68)</b> |
| <b>Cigarette smoking</b>                                                                                                                                                                                                                                                                                                                                                                                                                                                                                                                                                                                                                                                                                                                                                    |          |                          |                          |                          |                          |
| Yes vs No                                                                                                                                                                                                                                                                                                                                                                                                                                                                                                                                                                                                                                                                                                                                                                   | 161/3473 | 0.96 (0.76, 1.22)        | 0.96 (0.73, 1.27)        | 0.97 (0.73, 1.31)        | 0.94 (0.71, 1.25)        |
| <b>Health conditions</b>                                                                                                                                                                                                                                                                                                                                                                                                                                                                                                                                                                                                                                                                                                                                                    |          |                          |                          |                          |                          |
| Comorbid HD, Diabetes or Stroke                                                                                                                                                                                                                                                                                                                                                                                                                                                                                                                                                                                                                                                                                                                                             |          |                          |                          |                          |                          |
| <b>Yes vs No</b>                                                                                                                                                                                                                                                                                                                                                                                                                                                                                                                                                                                                                                                                                                                                                            | 205/3183 | <b>2.63 (1.84, 3.76)</b> | <b>2.04 (1.40, 2.98)</b> | <b>1.99 (1.37, 2.89)</b> | <b>1.98 (1.37, 2.86)</b> |
| <p><b>Notes:</b> Odds Ratios (95% Confidence Intervals); Bold indicates p-value&lt;0.05.*Model 1 are crude models. Models 2-4 are adjusted models.<br/> <sup>‡</sup> Model 2 adjusts for demographic factors; age, sex, race, education, alcohol consumption, smoking, BMI and comorbidity due to Diabetes, Heart diseases and Stroke.<br/> <sup>α</sup> Model 3 adjusts for demographic factors; age, sex, race, education, alcohol consumption, smoking, BMI and comorbidity due to Diabetes, Heart diseases and Stroke plus Toxic stress measures.<br/> <sup>†</sup> Model 4 adjusts for demographic factors- age, sex, race, education, alcohol consumption, smoking, BMI and comorbidity due to Diabetes, Heart diseases plus Stroke and indicators of resilience.</p> |          |                          |                          |                          |                          |

**Supplementary Table 3: The relationship between Race and Neurocognitive Impairment with or without adjustment for Toxic Stress or Resilience promoting factors.**

| Characteristic                                                                                                                                                                                                                                                                                                                                                                                  | Adjusted for   | Association                     | Model 1 (Crude)*         | Model 5 <sup>‡</sup>     | p-value (Interaction) |
|-------------------------------------------------------------------------------------------------------------------------------------------------------------------------------------------------------------------------------------------------------------------------------------------------------------------------------------------------------------------------------------------------|----------------|---------------------------------|--------------------------|--------------------------|-----------------------|
|                                                                                                                                                                                                                                                                                                                                                                                                 |                |                                 | OR (95% CI)              | OR (95% CI)              |                       |
| Race*Discrimination                                                                                                                                                                                                                                                                                                                                                                             |                |                                 |                          |                          |                       |
| Race                                                                                                                                                                                                                                                                                                                                                                                            | Discrimination | Black (AA) vs Caucasian         | <b>1.76 (1.21, 2.56)</b> | 1.33 (0.74, 2.40)        | 0.3653                |
|                                                                                                                                                                                                                                                                                                                                                                                                 |                | Other vs Caucasian              | <b>2.09 (1.18, 3.72)</b> | 1.78 (0.89, 3.56)        |                       |
|                                                                                                                                                                                                                                                                                                                                                                                                 |                | Black (AA) vs Other             | 0.84 (0.42, 1.68)        | 0.75 (0.33, 1.69)        |                       |
| Race*Mastery                                                                                                                                                                                                                                                                                                                                                                                    |                |                                 |                          |                          |                       |
| Race                                                                                                                                                                                                                                                                                                                                                                                            | Mastery        | Black (AA) vs Caucasian         | <b>1.76 (1.21, 2.56)</b> | 1.20 (0.79, 1.82)        | 0.0272                |
|                                                                                                                                                                                                                                                                                                                                                                                                 |                | Other vs Caucasian              | <b>2.09 (1.18, 3.72)</b> | 1.38 (0.77, 2.47)        |                       |
|                                                                                                                                                                                                                                                                                                                                                                                                 |                | Black (AA) vs Other             | 0.84 (0.42, 1.68)        | 0.87 (0.44, 1.72)        |                       |
| <b>Other predictors</b>                                                                                                                                                                                                                                                                                                                                                                         |                |                                 |                          |                          |                       |
| Discrimination*Mastery                                                                                                                                                                                                                                                                                                                                                                          |                |                                 |                          |                          |                       |
| Discrimination                                                                                                                                                                                                                                                                                                                                                                                  | Mastery        | One or more experiences vs None | <b>4.05 (2.61, 6.30)</b> | <b>3.25 (2.14, 4.92)</b> | 0.0297                |
| Mastery*Age                                                                                                                                                                                                                                                                                                                                                                                     |                |                                 |                          |                          |                       |
| Mastery                                                                                                                                                                                                                                                                                                                                                                                         | Age            | Low vs High global mastery      | <b>2.38 (1.78, 3.20)</b> | <b>1.73 (1.28, 2.34)</b> | 0.5851                |
| Discrimination*Age                                                                                                                                                                                                                                                                                                                                                                              |                |                                 |                          |                          |                       |
| Discrimination                                                                                                                                                                                                                                                                                                                                                                                  | Age            | One or more experiences vs None | <b>4.05 (2.61, 6.30)</b> | <b>2.76 (1.87, 4.08)</b> | 0.1379                |
| Chronic stress*Age                                                                                                                                                                                                                                                                                                                                                                              |                |                                 |                          |                          |                       |
| Chronic stress                                                                                                                                                                                                                                                                                                                                                                                  | Age            | High vs low chronic stress      | <b>1.88 (1.43, 2.49)</b> | <b>1.75 (1.28, 2.41)</b> | 0.0218                |
| <p><b>Notes:</b> OR (95%CI): Odds Ratios (95% Confidence Intervals); Bold indicates p-value&lt;0.05; *Model 1 are crude models.<br/> <sup>‡</sup>Models 5 adjust for race and demographic factors- age, sex, education, alcohol consumption, smoking, BMI and comorbidity due to Diabetes, Heart diseases plus Stroke and resilience indicators. Interaction terms have been added as well.</p> |                |                                 |                          |                          |                       |
